# Supplementary material
Source: publisher figshare collection journal article supplement (https://acs.figshare.com/ndownloader/files/9441070)
Supplement: Supplementary file 1 [file 9441070]

## Supporting Information

### Unusual Spinel-to-Layered Transformation in $\text{LiMn}_2\text{O}_4$ Cathode Explained by Electrochemical & Thermal-Stability Investigation

Liubin Ben<sup>†,‡</sup>, Hailong Yu<sup>†,‡</sup>, Bin Chen<sup>†,‡</sup>, Yuyang Chen<sup>†,‡</sup>, Yue Gong<sup>†,‡</sup>, Xinan Yang<sup>†,‡</sup>, Lin Gu<sup>†,‡,§</sup> and Xuejie Huang<sup>†,‡,\*</sup>

<sup>†</sup> Beijing National Laboratory for Condensed Matter Physics, Institute of Physics, Chinese Academy of Sciences, Beijing, 100190, China

<sup>‡</sup> School of Physical Sciences, University of Chinese Academy of Sciences, Beijing, 100190, China

<sup>§</sup> Collaborative Innovation Center of Quantum Matter, Beijing 100190, China

\*E-mail: xjhuang@iphy.ac.cn (X. J. Huang)

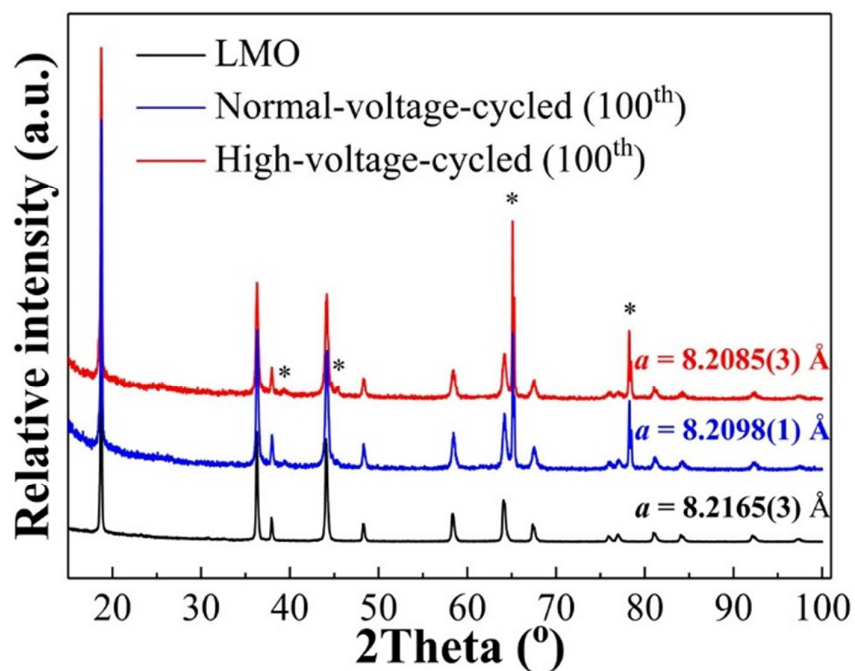

**Figure S1.** XRD patterns of pristine, normal-voltage-cycled (3-4.3 V, 100<sup>th</sup> cycle) and high-voltage-cycled (3-4.9 V, 100<sup>th</sup> cycle) LMO. Black asterisks indicate the reflections associated with the Al current collector.

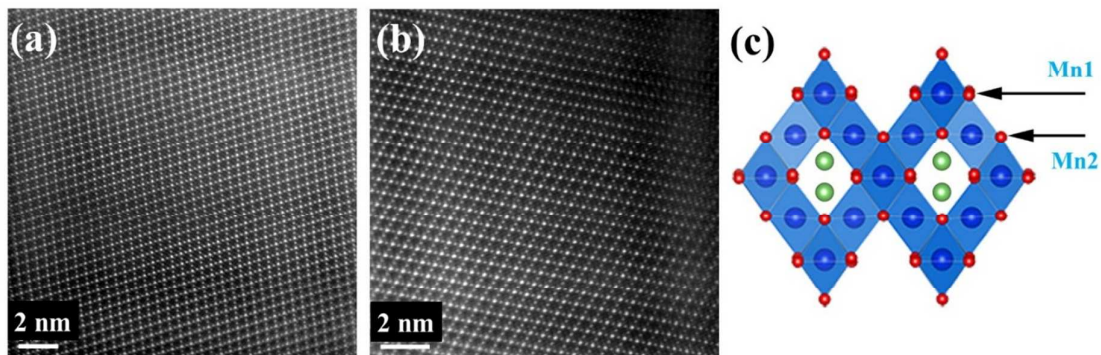

**Figure S2.** STEM-HAADF image of the bulk region of (a) normal-voltage-cycled (3-4.3 V, 16<sup>th</sup> cycle) and (b) high-voltage-cycled (3-4.9 V, 16<sup>th</sup> cycle) LMO. (c) Schematic of crystal structure of spinel LMO viewed along the [1 1 0] direction.

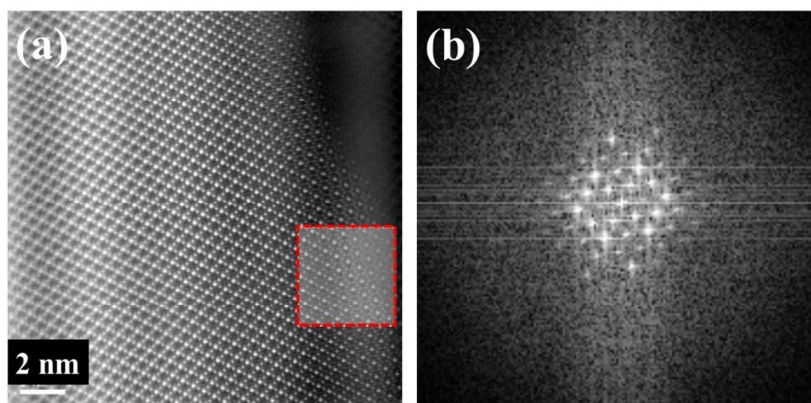

**Figure S3.** (a) STEM-HAADF of the surface and subsurface regions of normal-voltage-cycled (3-4.3 V, 16<sup>th</sup> cycle) LMO and (b) FFTs corresponding to the distorted  $\text{LiMn}_3\text{O}_4$ -like surface region marked by red box in (a).

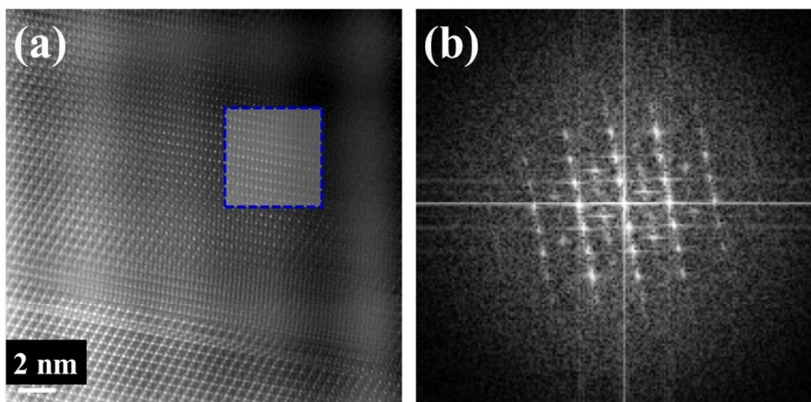

**Figure S4.** (a) STEM-HAADF image of the surface and subsurface regions of high-voltage-cycled (3-4.9 V, 16<sup>th</sup> cycle) LMO and (b) FFTs corresponding to the distorted layered-like surface region marked by red box in (a).

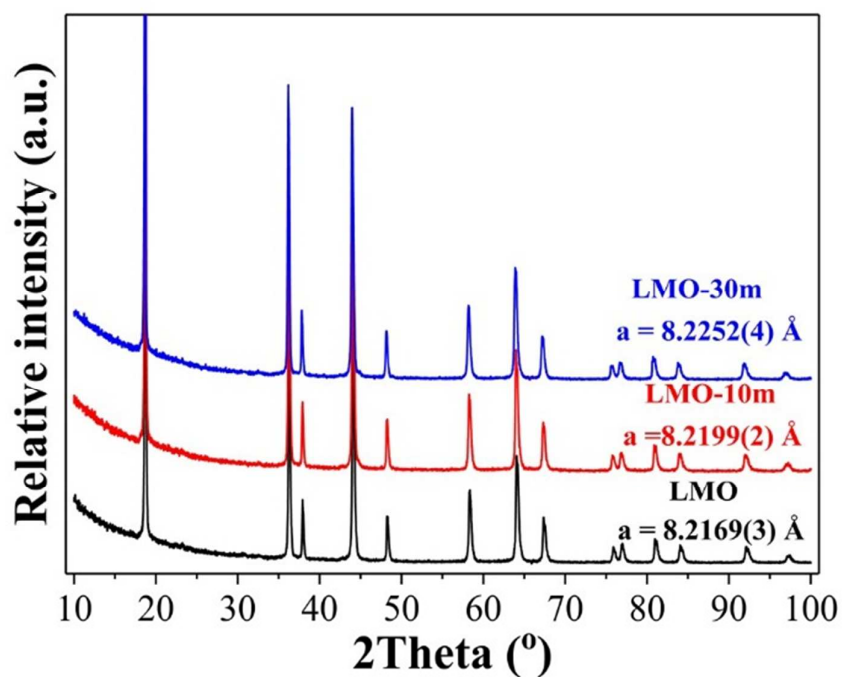

**Figure S5.** XRD patterns of pristine LMO and heat-treated LMO (600 °C for 10 and 30 minutes).

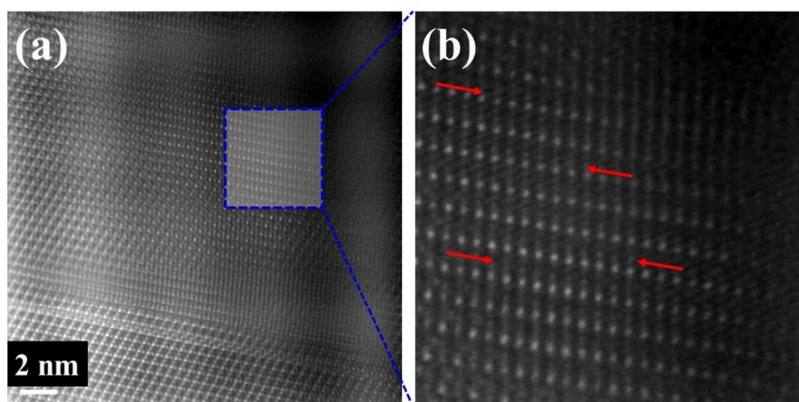

**Figure S6.** (a) STEM-HAADF image of the surface and subsurface regions of high-voltage-cycled (3-4.9 V, 16<sup>th</sup> cycle) LMO and (b) enlarged image corresponding to the layered-like surface region marked by blue box in (a). Red arrows in (b) indicate weak contrast associated with Mn ions between the layers.

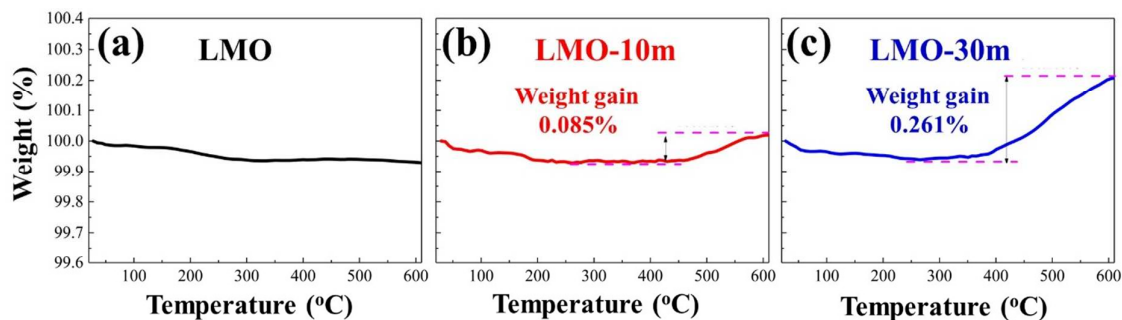

**Figure S7.** TGA curves of (a) pristine LMO, (b) LMO-10m and (c) LMO-30m. The heating rate is 10 °C/minute and the atmosphere during the experiments is 80% argon and 20% oxygen.

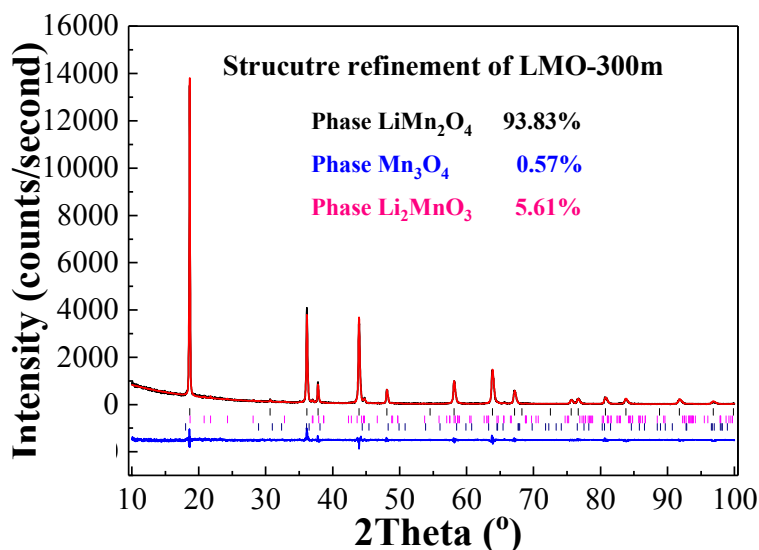

**Figure S8a.** Rietveld refinement profiles using room-temperature XRD data for LMO-300m refined in space group Fd-3m. The secondary phases are indexed as defect spinel  $\text{LiMn}_3\text{O}_4$  and layered  $\text{Li}_2\text{MnO}_3$ , which are refined in space group of Fd-3m and C2/m, respectively. Observed, calculated and difference profiles are shown in blue, red and gray, respectively. Top tick marks show reflection positions for spinel  $\text{LiMn}_2\text{O}_4$ , middle tick marks show reflection positions for defect-spinel  $\text{LiMn}_3\text{O}_4$  and bottom tick marks show reflection positions for layered  $\text{Li}_2\text{MnO}_3$ .

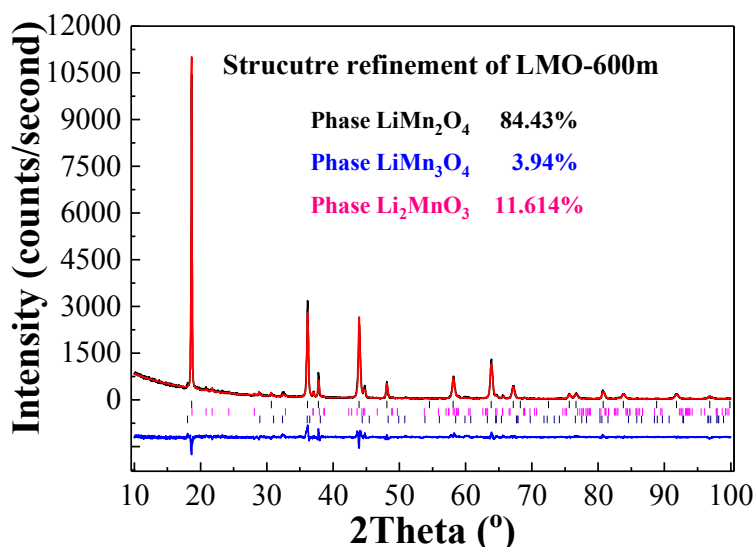

**Figure S8b.** Rietveld refinement profiles using room-temperature XRD data for LMO-600m refined in space group Fd-3m. The secondary phases are indexed as defect spinel  $\text{LiMn}_3\text{O}_4$  and layered  $\text{Li}_2\text{MnO}_3$ , which are refined in space group of Fd-3m and C2/m, respectively. Observed, calculated and difference profiles are shown in blue, red and gray, respectively. Top tick marks show reflection positions for spinel  $\text{LiMn}_2\text{O}_4$ , middle tick marks show reflection positions for defect-spinel  $\text{LiMn}_3\text{O}_4$  and bottom tick marks show reflection positions for layered  $\text{Li}_2\text{MnO}_3$ .

**Table S1.** Refined structural parameters for spinel LMO phase, defect spinel  $\text{LiMn}_3\text{O}_4$  phase and layered  $\text{Li}_2\text{MnO}_3$  phase in LMO-300m.

| Refined structural parameters for spinel LMO phase in LMO-300m                                                                   |              |        |        |        |      |
|----------------------------------------------------------------------------------------------------------------------------------|--------------|--------|--------|--------|------|
| Space group Fd-3m, $a = b = c = 8.2398(3) \text{ \AA}$ , Phase fraction 93.83%                                                   |              |        |        |        |      |
| Atom                                                                                                                             | Wyckoff site | x      | y      | z      | Beq  |
| Li                                                                                                                               | 8a           | 0      | 0      | 0      | 1.53 |
| Mn                                                                                                                               | 16d          | 5/8    | 5/8    | 5/8    | 0.74 |
| O                                                                                                                                | 32e          | 0.3875 | =x     | =x     | 1    |
| Refined structural parameters for defect spinel $\text{LiMn}_3\text{O}_4$ phase in LMO-300m                                      |              |        |        |        |      |
| Space group $I4_1/amd$ , $a = b = 5.8139(1) \text{ \AA}$ , $c = 9.3675(3) \text{ \AA}$ , Phase fraction 0.57%                    |              |        |        |        |      |
| Atom                                                                                                                             | Wyckoff site | x      | y      | z      | Beq  |
| Mn1                                                                                                                              | 4a           | 0      | 1/4    | 0.8284 | 0.74 |
| Mn2                                                                                                                              | 8d           | 0      | 1/2    | 1/2    | 0.74 |
| O                                                                                                                                | 16h          | 0      | 0.3752 | 0.3402 | 1    |
| Structural parameters obtained for layered $\text{Li}_2\text{MnO}_3$ phase in LMO-300m                                           |              |        |        |        |      |
| Space group C2/m, $a = 4.9272(4) \text{ \AA}$ , $b = 8.5361(3) \text{ \AA}$ , $c = 5.0234(1) \text{ \AA}$ , Phase fraction 5.60% |              |        |        |        |      |
| Atom                                                                                                                             | Wyckoff site | x      | y      | z      | Beq  |
| Li1                                                                                                                              | 2b           | 0      | 1/2    | 0      | 1.53 |

|            |    |        |        |        |      |
|------------|----|--------|--------|--------|------|
| <b>Li2</b> | 2c | 0      | 0      | 1/2    | 1.53 |
| <b>Li3</b> | 4h | 0      | 0.7087 | 1/2    | 1.53 |
| <b>Mn</b>  | 4g | 0      | 0.1713 | 0      | 0.74 |
| <b>O1</b>  | 4i | 0.2805 | 0      | 0.2233 | 1    |
| <b>O2</b>  | 8j | 0.2483 | 0.3529 | 0.2255 | 1    |

wRp = 9.182%, Rp = 6.564%, gof = 1.306. To avoid over-refinement of XRD data, site occupancy are fixed to 1, Beq for the same element is fixed to the same value and fraction occupancy of Li in LiMn<sub>3</sub>O<sub>4</sub> is not refined.

**Table S2.** Refined structural parameters for spinel LMO phase, defect spinel LiMn<sub>3</sub>O<sub>4</sub> phase and layered Li<sub>2</sub>MnO<sub>3</sub> phase in LMO-600m.

| <b>Refined structural parameters for spinel LMO phase in LMO-600m</b>                 |                     |          |          |          |            |
|---------------------------------------------------------------------------------------|---------------------|----------|----------|----------|------------|
| <b>Space group Fd-3m, <math>a = b = c = 8.2412(4)</math> Å, Phase fraction 84.43%</b> |                     |          |          |          |            |
| <b>Atom</b>                                                                           | <b>Wyckoff site</b> | <b>x</b> | <b>y</b> | <b>z</b> | <b>Beq</b> |
| <b>Li</b>                                                                             | 8a                  | 0        | 0        | 0        | 1.47       |
| <b>Mn</b>                                                                             | 16d                 | 5/8      | 5/8      | 5/8      | 0.62       |
| <b>O</b>                                                                              | 32e                 | 0.3849   | =x       | = x      | 1          |

  

| <b>Refined structural parameters for defect spinel LiMn<sub>3</sub>O<sub>4</sub> phase in LMO-600m</b>                      |                     |          |          |          |            |
|-----------------------------------------------------------------------------------------------------------------------------|---------------------|----------|----------|----------|------------|
| <b>Space group I4<sub>1</sub>/amd, <math>a = b = 5.8139(2)</math> Å, <math>c = 9.3675(3)</math> Å, Phase fraction 3.94%</b> |                     |          |          |          |            |
| <b>Atom</b>                                                                                                                 | <b>Wyckoff site</b> | <b>x</b> | <b>y</b> | <b>Z</b> | <b>Beq</b> |
| <b>Mn1</b>                                                                                                                  | 4a                  | 0        | 1/4      | 0.8284   | 0.62       |
| <b>Mn2</b>                                                                                                                  | 8d                  | 0        | 1/2      | 1/2      | 0.62       |
| <b>O</b>                                                                                                                    | 16h                 | 0        | 0.3752   | 0.3402   | 1          |

  

| <b>Structural parameters obtained for layered Li<sub>2</sub>MnO<sub>3</sub> phase in LMO-600m</b>                                        |                     |          |          |          |            |
|------------------------------------------------------------------------------------------------------------------------------------------|---------------------|----------|----------|----------|------------|
| <b>Space group C2/m, <math>a = 4.9272(3)</math> Å, <math>b = 8.5361(1)</math> Å, <math>c = 5.0234(2)</math> Å, Phase fraction 11.63%</b> |                     |          |          |          |            |
| <b>Atom</b>                                                                                                                              | <b>Wyckoff site</b> | <b>x</b> | <b>y</b> | <b>z</b> | <b>Beq</b> |
| <b>Li1</b>                                                                                                                               | 2b                  | 0        | 1/2      | 0        | 1.47       |
| <b>Li2</b>                                                                                                                               | 2c                  | 0        | 0        | 1/2      | 1.47       |
| <b>Li3</b>                                                                                                                               | 4h                  | 0        | 0.7029   | 1/2      | 1.47       |
| <b>Mn</b>                                                                                                                                | 4g                  | 0        | 0.1736   | 0        | 0.62       |
| <b>O1</b>                                                                                                                                | 4i                  | 0.2605   | 0        | 0.2110   | 1          |
| <b>O2</b>                                                                                                                                | 8j                  | 0.2427   | 0.3628   | 0.2419   | 1          |

wRp = 9.883%, Rp = 6.984%, gof = 1.376. To avoid over-refinement of XRD data, site occupancy are fixed to 1, Beq for the same element is fixed to the same value and fraction occupancy of Li in LiMn<sub>3</sub>O<sub>4</sub> is not refined.

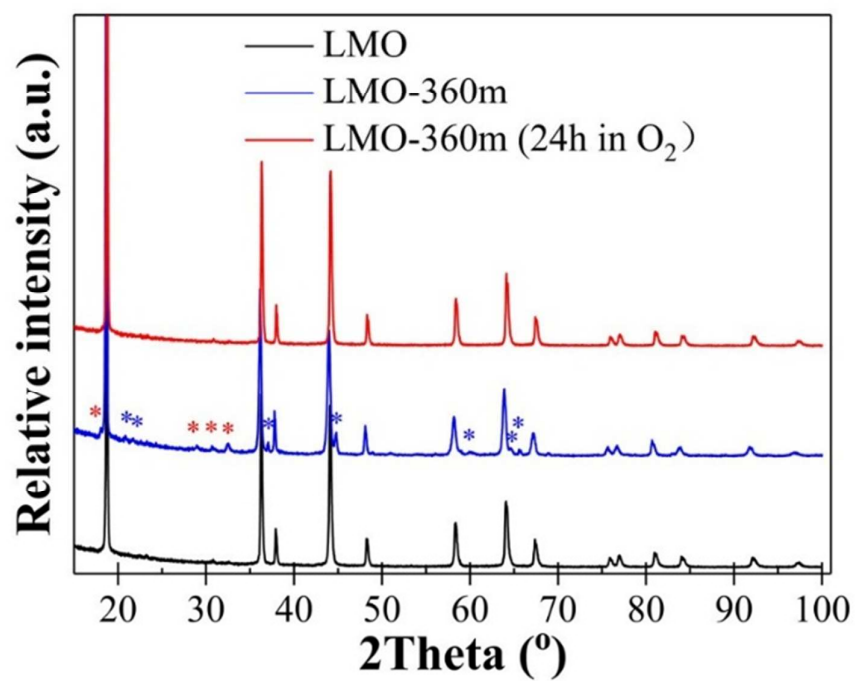

**Figure S9.** XRD patterns of LMO, heat-treated LMO-360m (argon atmosphere) and re-annealed LMO-360m (O<sub>2</sub>). Red asterisks indicate the reflections associated with LiMn<sub>3</sub>O<sub>4</sub> and blue asterisks indicate the reflections associated with Li<sub>2</sub>MnO<sub>3</sub>.
